# Supplementary material
Source: HighWire-hosted journal article supplement (https://bmjopen.bmj.com/content/12/4/e052142)
Supplement: inline-supplementary-material-2 [file inline-supplementary-material-2.pdf]

---

**Supplemental Table 2. Search strategy**

---

**PubMed****No. Search items**

- #1 "dezocine"[Supplementary Concept] OR dezocine[Title/Abstract]
- #2 (((((((((((((((Analgescics, Opioid[MeSH Terms]) OR Opioid[Title/Abstract]) OR Fentanyl[MeSH Terms]) OR Fentanyl[Title/Abstract]) OR Phentanyl[Title/Abstract]) OR Fentanyl Citrate[Title/Abstract]) OR Sufentanil[MeSH Terms]) OR Sufentanil[Title/Abstract]) OR Sulfentanyl[Title/Abstract]) OR Sulfentanil[Title/Abstract]) OR Sufentanil Citrate[Title/Abstract]) OR Remifentanil[MeSH Terms]) OR Remifentanil[Title/Abstract]) OR Remifentanil Hydrochloride[Title/Abstract]) OR Alfentanil[MeSH Terms]) OR Alfentanil[Title/Abstract]) OR Alfentanyl[Title/Abstract]) OR Alfentanil Hydrochloride[Title/Abstract]
- #3 (((Cough[MeSH Terms]) OR Cough[Title/Abstract]) OR Coughs[Title/Abstract]) OR Antitussive[Title/Abstract]) OR Anti-tussive[Title/Abstract]
- #4 ((((((Randomized Controlled Trial[Publication Type]) OR Randomized Controlled Trial) OR Controlled Clinical Trial[Publication Type]) OR Controlled Clinical Trial) OR Randomized) OR Placebo) OR randomly
- #5 #1 AND #2 AND #3 AND #4
-

---

**Embase**

('dezocine'/exp OR dezocine:ab,ti) AND ('opiate agonist'/exp OR opioid:ab,ti OR 'fentanyl derivative'/exp OR fentanyl:ab,ti OR 'fentanyl citrate':ab,ti OR sufentanil:ab,ti OR 'sufentanil citrate':ab,ti OR remifentanil:ab,ti OR alfentanil:ab,ti) AND ('coughing'/exp OR coughing:ab,ti OR cough:ab,ti OR antitussive:ab,ti OR anti-tussive:ab,ti) AND ('randomized controlled trial'/exp OR 'randomized controlled trial':it OR 'randomized controlled trial':ab,ti OR randomized OR placebo OR randomly)

---

**Cochrane Library****No. Search items**

- #1 (dezocine): ti, ab, kw
- #2 [Analgesics, Opioid] explode all trees OR (opioid): ti, ab, kw OR [Fentanyl] explode all trees OR (fentanyl): ti, ab, kw OR (fentanyl citrate): ti, ab, kw OR (phentanyl): ti, ab, kw OR [Sufentanil] explode all trees OR (sufentanil): ti, ab, kw OR (sufentanil citrate): ti, ab, kw OR (sulfentanyl): ti, ab, kw OR [Remifentanil] explode all trees OR (remifentanil): ti, ab, kw OR (remifentanil monohydrochloride): ti, ab, kw OR (remifentanil hydrochloride): ti, ab, kw OR [Alfentanil] explode all trees OR (alfentanil): ti, ab, kw OR (alfentanil hydrochloride): ti, ab, kw OR (alfentanyl): ti, ab, kw
- #3 [Cough] explode all trees OR (cough): ti, ab, kw OR (coughs): ti, ab, kw OR (antitussive):ti, ab, kw OR (anti-tussive):ti, ab, kw
- #4 [Randomized Controlled Trial] explode all trees OR (Randomized Controlled Trial): ti, ab, kw OR [Randomized Controlled Trials as Topic] explode all trees OR [Controlled Clinical Trial] explode all trees OR (Controlled Clinical Trial): ti, ab, kw OR [Controlled Clinical Trial as Topic] explode all trees

#5 #1 AND #2 AND #3 AND #4

---

### Ovid

#### No. Search items

#1 dezocine.mp. [mp=title, abstract, full text, caption text]

#2 (opioid or opioid or "Analgesics, Opioid" or fentanyl or phentanyl or "fentanyl citrate" or sufentanil or sulfentanyl or "sufentanil citrate" or remifentanil or "remifentanil hydrochloride" or alfentanil or alfentanyl or "alfentanil hydrochloride").mp. [mp=title, abstract, full text, caption text]

#3 (cough or coughs or coughing or antitussive or anti-tussive).mp. [mp=title, abstract, full text, caption text]

#4 ("randomized controlled trial" or "controlled clinical trial" or randomized or placebo or randomly).mp. [mp=title, abstract, full text, caption text]

#5 #1 AND #2 AND #3 AND #4

---

### Web of Science

TS=dezocine AND TS=(opioid OR opioid OR "Analgesics, Opioid" OR fentanyl OR phentanyl OR "fentanyl citrate" OR sufentanil OR sulfentanyl OR "sufentanil citrate" OR remifentanil OR "remifentanil hydrochloride" OR alfentanil OR alfentanyl OR "alfentanil hydrochloride") AND TS=(cough OR coughs OR coughing OR antitussive OR anti-tussive) AND TS=("randomized controlled trial" OR "controlled clinical trial" OR randomized OR placebo OR randomly)

---

### SinoMed

**No. Search items**

- #1 "地佐辛"[不加权:扩展] OR "地佐辛"[摘要:智能]
- #2 "阿片"[不加权:扩展] OR "阿片"[中文标题:智能] OR "镇痛药,"[不加权:扩展] AND "阿片类"[不加权:扩展] OR "芬太尼"[不加权:扩展] OR "芬太尼"[中文标题:智能] OR "舒芬太尼"[不加权:扩展] OR "舒芬太尼"[中文标题:智能] OR "瑞芬太尼"[中文标题:智能] OR "阿芬太尼"[不加权:扩展] OR "阿芬太尼"[中文标题:智能]
- #3 "咳嗽"[不加权:扩展] OR "咳嗽"[中文标题:智能] OR "呛咳"[中文标题:智能] OR "止咳"[不加权:扩展] OR "止咳"[中文标题:智能] OR "镇咳"[不加权:扩展] OR "镇咳"[中文标题:智能]
- #4 "随机对照试验"[不加权:扩展] OR "临床对照试验"[不加权:扩展] OR "随机地"[摘要:智能] OR "随机的"[摘要:智能] OR "对照"[摘要:智能] OR "安慰剂"[摘要:智能]
- #5 #1 AND #2 AND #3 AND #4

**CNKI**

(SU='地佐辛' OR AB='地佐辛') AND (SU=('阿片'+阿片类镇痛药'+芬太尼'+舒芬太尼'+瑞芬太尼'+阿芬太尼') OR TI=('阿片'+阿片类镇痛药'+芬太尼'+舒芬太尼'+瑞芬太尼'+阿芬太尼')) AND (SU=('咳嗽'+呛咳'+止咳'+镇咳') OR TI=('咳嗽'+呛咳'+止咳'+镇咳')) AND (SU=('随机对照试验'+临床对照试验'+随机的'+随机地'+安慰剂'+对照') OR AB=('随机对照试验'+临床对照试验'+随机的'+随机地'+安慰剂'+对照'))

---

**Wanfang Data**

(主题:地佐辛+摘要:地佐辛)\*(主题:(阿片+阿片类镇痛药+芬太尼+舒芬太尼+瑞芬太尼+阿芬太尼)+题名:(阿片+阿片类镇痛药+芬太尼+舒芬太尼+瑞芬太尼+阿芬太尼))\*(主题:(咳嗽+呛咳+止咳+镇咳)+题名:(咳嗽+呛咳+止咳+镇咳))\*(主题:(随机对照试验+临床对照试验+随机的+随机地+安慰剂+对照)+摘要:(随机对照试验+临床对照试验+随机的+随机地+安慰剂+对照))

---

**VIP Data**

(M=地佐辛 OR R=地佐辛) AND (M=阿片 OR 阿片类镇痛药 OR 芬太尼 OR 舒芬太尼 OR 瑞芬太尼 OR 阿芬太尼 OR R=阿片 OR 阿片类镇痛药 OR 芬太尼 OR 舒芬太尼 OR 瑞芬太尼 OR 阿芬太尼) AND (M=咳嗽 OR 呛咳 OR 止咳 OR 镇咳 OR R=咳嗽 OR 呛咳 OR 止咳 OR 镇咳) AND (M=随机对照试验 OR 临床对照试验 OR 随机的 OR 随机地 OR 安慰剂 OR 对照 OR R=随机对照试验 OR 临床对照试验 OR 随机的 OR 随机地 OR 安慰剂 OR 对照)

---
